# Supplementary material for: Arginine insertion and loss of N-linked glycosylation site in HIV-1 envelope V3 region confer CXCR4-tropism
Source: PubMed Central journal article supplement — Sci Rep. 2013 Aug 8;3:2389. doi: 10.1038/srep02389 (PMC3737504; doi:10.1038/srep02389), 2013-08-08
Supplement: srep02389-s1.pdf [file srep02389-s1.pdf]

# **Arginine Insertion and Loss of N-linked Glycosylation Site in HIV-1 Envelope V3 Region Confer CXCR4-tropism**

Kiyoto Tsuchiya<sup>1</sup>, Hirotaka Ode<sup>2,3</sup>, Tsunefusa Hayashida<sup>1,4</sup>, Junko Kakizawa<sup>1</sup>, Hironori Sato<sup>2</sup>, Shinichi Oka<sup>1,4</sup> and Hiroyuki Gatanaga<sup>1,4</sup>

<sup>1</sup>AIDS Clinical Center, National Center for Global Health and Medicine  
1-21-1 Toyama, Shinjuku-ku, Tokyo 162-8655, Japan

<sup>2</sup>Pathogen Genomics Center, National Institute of Infectious Diseases  
4-7-1 Gakuen, Musashimurayama-shi, Tokyo 208-0011, Japan

<sup>3</sup>Clinical Research Center, National Hospital Organization Nagoya Medical Center  
4-1-1 Sannomaru, Naka-ku, Nagoya 460-0001, Japan

<sup>4</sup>Center for AIDS Research, Kumamoto University  
2-2-1 Honjo, Chuo-ku, Kumamoto 860-0811, Japan

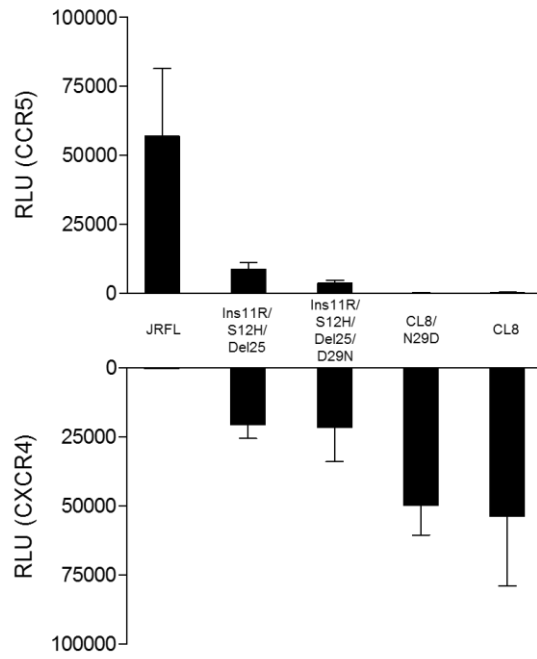

**Supplementary Figure S1.** Effects of D29N in cell-cell fusion assay. Cell-cell fusion assay was performed using Env-expressing 293T cells and CD4<sup>+</sup> and CCR5<sup>+</sup>/CXCR4<sup>+</sup> COS-7 cells. Data are mean  $\pm$  SD values in relative luminescent unit (RLU) of six experiments (performed in duplicate and repeated three times).

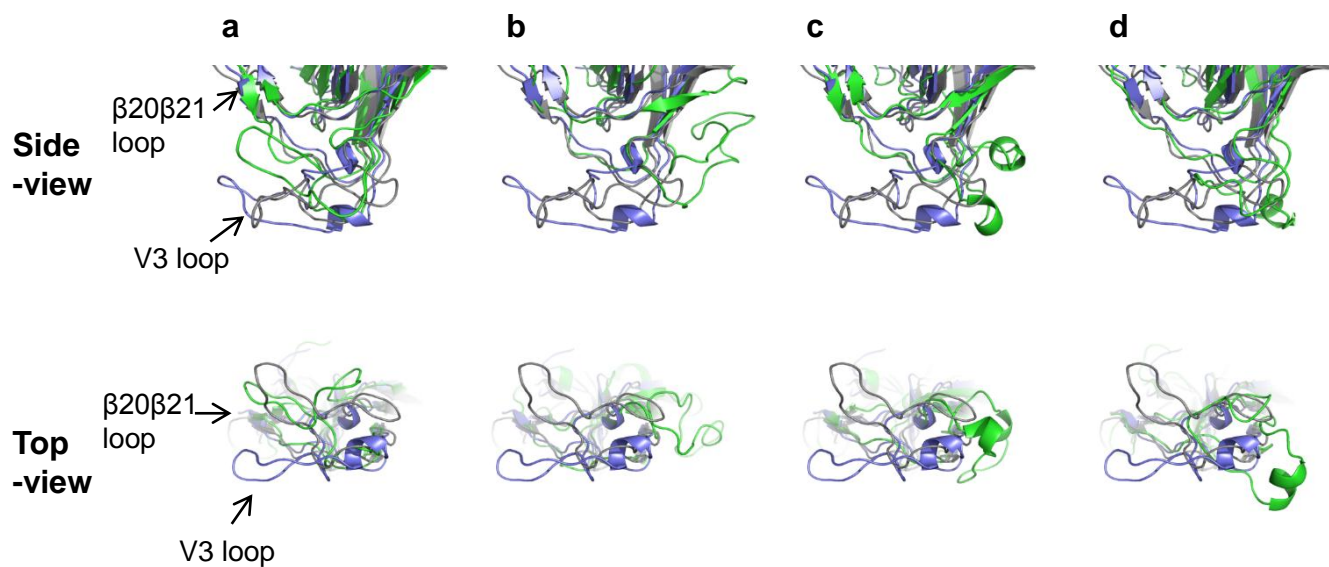

**Supplementary Figure S2.** Structural models of V3 loops of Ins11R/S12H/Del25-derived mutants. MD simulations were performed for the HIV-1 Ins11R/S12H/Del25 gp120 outer domain with N5Y (a), K10I (b), Y22H (c), or V26G (d) substitution in V3 loop. Structures were constructed and superimposed as described in Fig. 3 caption. (a) Superimposition of N5Y (green), Ins11R/S12H/Del25 (gray), and CL8 (navy). (b) Superimposition of K10I (green), Ins11R/S12H/Del25 (gray), and CL8 (navy). (c) Superimposition of Y22H (green), Ins11R/S12H/Del25 (gray), and CL8 (navy). (d) Superimposition of V26G (green), Ins11R/S12H/Del25 (gray), and CL8 (navy).

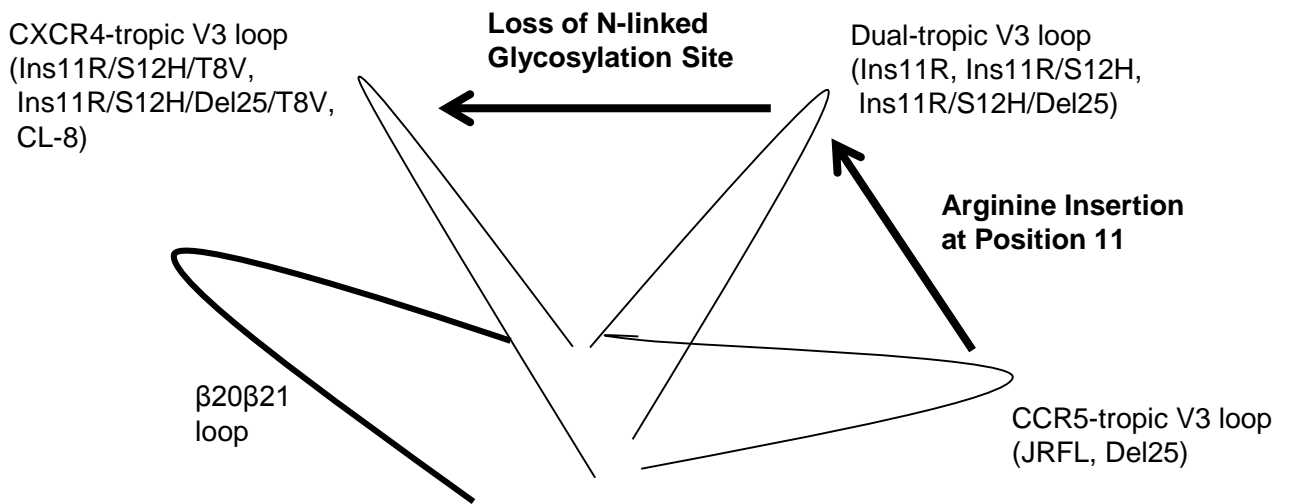

**Supplementary Figure S3.** Schematic summary of V3 loop orientation and tropism. CCR5-tropic V3 loop was placed in the opposite direction from the  $\beta$ 20- $\beta$ 21 loop. Arginine insertion at position 11 changed the V3 loop orientation and conferred dual-tropism. Loss of N-linked glycosylation site further changed the V3 loop orientation into the same direction with the  $\beta$ 20- $\beta$ 21 loop and altered it CXCR4-tropic.
